# Supplementary material
Source: publisher figshare collection journal article supplement (https://tandf.figshare.com/ndownloader/files/21207312)
Supplement: Supplementary file 1 [file 21207312]

## SUPPLEMENTARY MATERIAL

### Anti-inflammatory isocoumarins from the bark of *Fraxinus chinensis* subsp. *rhynchophylla*

Beom Zoo Lee,<sup>a,c</sup> Chan Sik Kim,<sup>b</sup> Soon-Kyu Jeong,<sup>a</sup> Sulhae Lee,<sup>a</sup> Ik Soo Lee,<sup>\*,b</sup> KwangWon Hong<sup>\*,c</sup>

<sup>a</sup>*Chemland Co., Ltd., Gunpo IT Valley B-1405, Gunpo, Republic of Korea;* <sup>b</sup>*Herbal Medicine Research Division, Korea Institute of Oriental Medicine, Daejeon, Republic of Korea;* <sup>c</sup>*Department of Food Science and Biotechnology, College of Life Science and Biotechnology, Dongguk University, Goyang, Republic of Korea*

#### ABSTRACT

A new isocoumarin (**1**) named fraxicoumarin was isolated from the bark of *Fraxinus chinensis* subsp. *rhynchophylla* along with three known compounds (**2–4**). The structure of the new compound was established by extensive spectroscopic studies and chemical evidence. The anti-inflammatory effects of the isolated compounds (**1–4**) on lipopolysaccharide (LPS)-induced RAW 264.7 macrophage cells were evaluated *in vitro*. Of the compounds tested, compounds **1** and **3** inhibited LPS-induced nitric oxide (NO) production in RAW 264.7 cells. Consistent with these findings, they also suppressed LPS-induced expression of inducible nitric oxide synthase (iNOS) and cyclooxygenase-2 (COX-2) at the protein level in RAW 264.7 cells.

**Keywords** *Fraxinus chinensis* subsp. *rhynchophylla*; isocoumarins; anti-inflammation; nitric oxide; inducible nitric oxide synthase; cyclooxygenase-2

## List of supporting information

| Contents                                                                                                                                                                                                                                                                                                                                                                         | Pages |
|----------------------------------------------------------------------------------------------------------------------------------------------------------------------------------------------------------------------------------------------------------------------------------------------------------------------------------------------------------------------------------|-------|
| <b>Figure S1.</b> Key $^1\text{H}$ - $^1\text{H}$ COSY and HMBC correlations of compound <b>1</b>                                                                                                                                                                                                                                                                                | 3     |
| <b>Figure S2.</b> $^1\text{H}$ -NMR spectra of ( <i>S</i> )- and ( <i>R</i> )-PGME amides <b>1c</b> and <b>1d</b> (400 MHz, $\text{CD}_3\text{OD}$ )                                                                                                                                                                                                                             | 4     |
| <b>Figure S3.</b> $^1\text{H}$ -NMR chemical-shift differences ( $\Delta\delta$ ppm) between ( <i>S</i> )- and ( <i>R</i> )-PGME amides <b>1c</b> and <b>1d</b>                                                                                                                                                                                                                  | 5     |
| <b>Figure S4.</b> Anti-inflammatory activities of compounds <b>1</b> and <b>3</b> . Effects of compounds <b>1</b> and <b>3</b> on LPS-induced NO production (A and B) and LPS-induced iNOS and COX-2 protein expression (C and D) in RAW 264.7 cells. The values are expressed as means $\pm$ SD from three independent experiments. * $P < 0.05$ vs. LPS, ** $P < 0.01$ vs. LPS | 6     |
| <b>Figure S5.</b> $^1\text{H}$ NMR spectrum of <b>1</b> (400 MHz, $\text{CD}_3\text{OD}$ )                                                                                                                                                                                                                                                                                       | 7     |
| <b>Figure S6.</b> $^{13}\text{C}$ NMR spectrum of <b>1</b> (100 MHz, $\text{CD}_3\text{OD}$ )                                                                                                                                                                                                                                                                                    | 7     |
| <b>Figure S7.</b> $^1\text{H}$ - $^1\text{H}$ COSY spectrum of <b>1</b> (500 MHz, $\text{CD}_3\text{OD}$ )                                                                                                                                                                                                                                                                       | 8     |
| <b>Figure S8.</b> HMBC spectrum of <b>1</b> (500 MHz, $\text{CD}_3\text{OD}$ )                                                                                                                                                                                                                                                                                                   | 9     |
| <b>Figure S9.</b> HMQC spectrum of <b>1</b> (500 MHz, $\text{CD}_3\text{OD}$ )                                                                                                                                                                                                                                                                                                   | 10    |
| <b>Figure S10.</b> HRESIMS spectrum of <b>1</b>                                                                                                                                                                                                                                                                                                                                  | 11    |

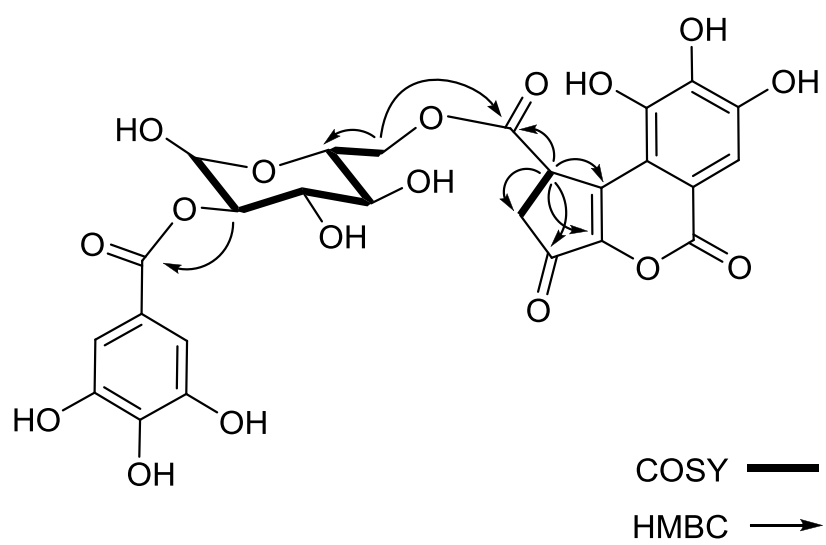

**Figure S1.** Key  $^1\text{H}$ - $^1\text{H}$  COSY and HMBC correlations of compound **1**

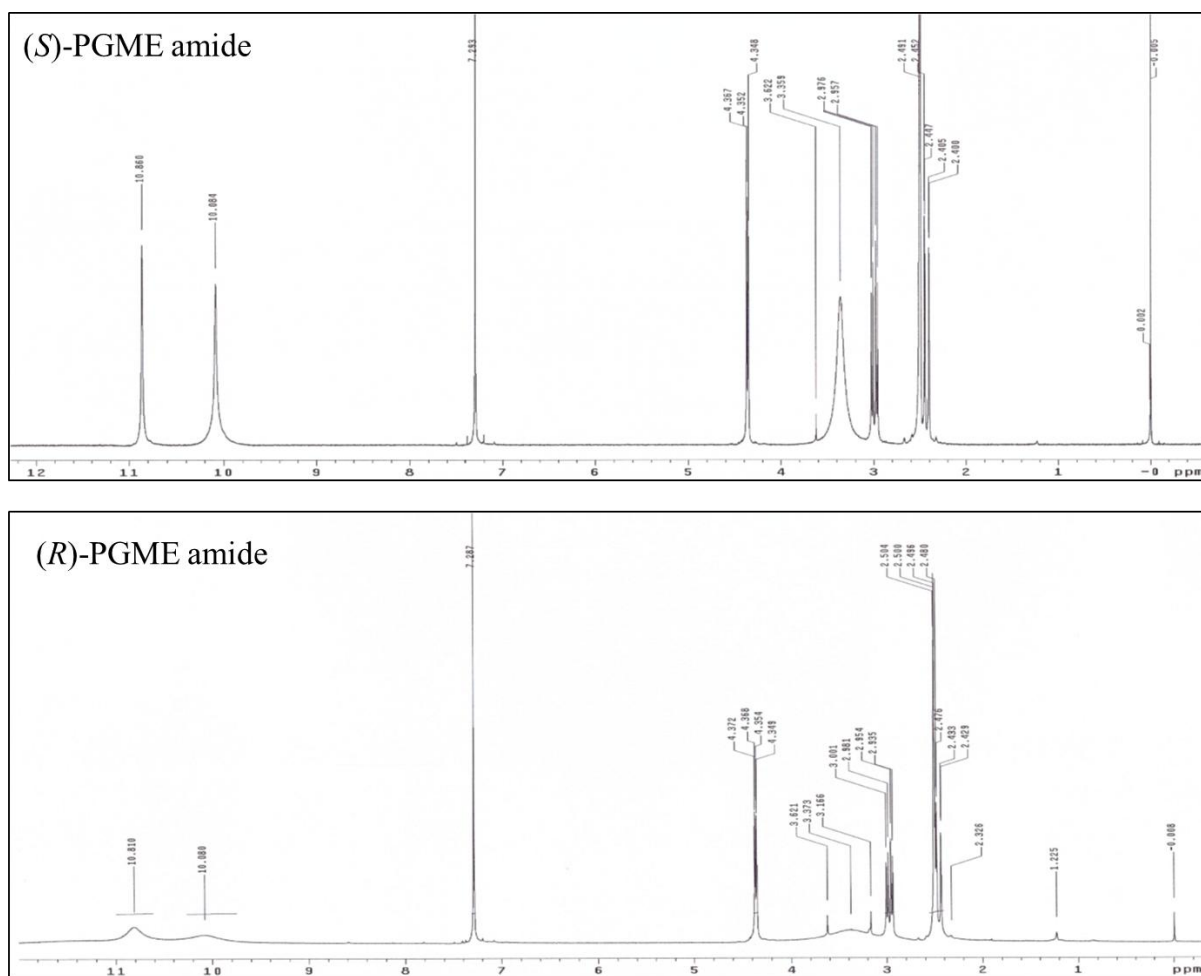

**Figure S2.**  $^1\text{H}$ -NMR spectra of (*S*)- and (*R*)-PGME amides **1c** and **1d** (400 MHz,  $\text{CD}_3\text{OD}$ )

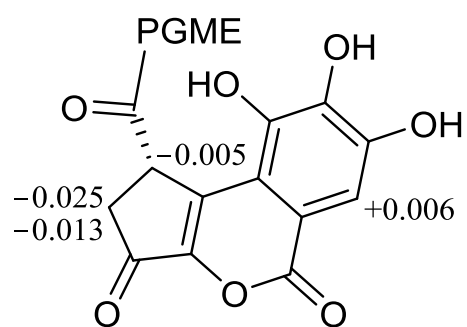

**1c** : R = (*S*)-PGME amide

**1d** : R = (*R*)-PGME amide

**Figure S3.**  $^1\text{H}$ -NMR chemical-shift differences ( $\Delta\delta$  ppm) between (*S*)- and (*R*)-PGME amides

**1c** and **1d**

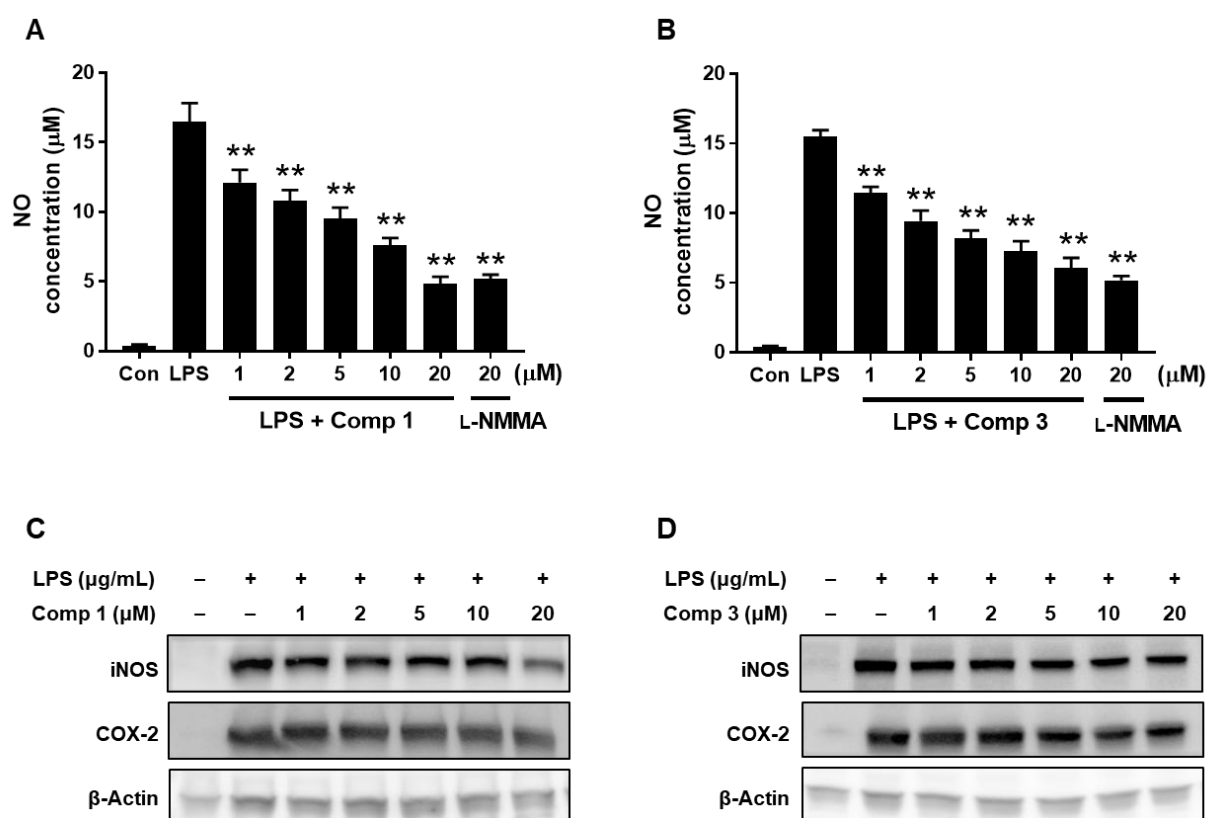

**Figure S4.** Anti-inflammatory activities of compounds **1** and **3**. Effects of compounds **1** and **3** on LPS-induced NO production (A and B) and LPS-induced iNOS and COX-2 protein expression (C and D) in RAW 264.7 cells. The values are expressed as means  $\pm$  SD from three independent experiments. \* $P < 0.05$  vs. LPS, \*\* $P < 0.01$  vs. LPS

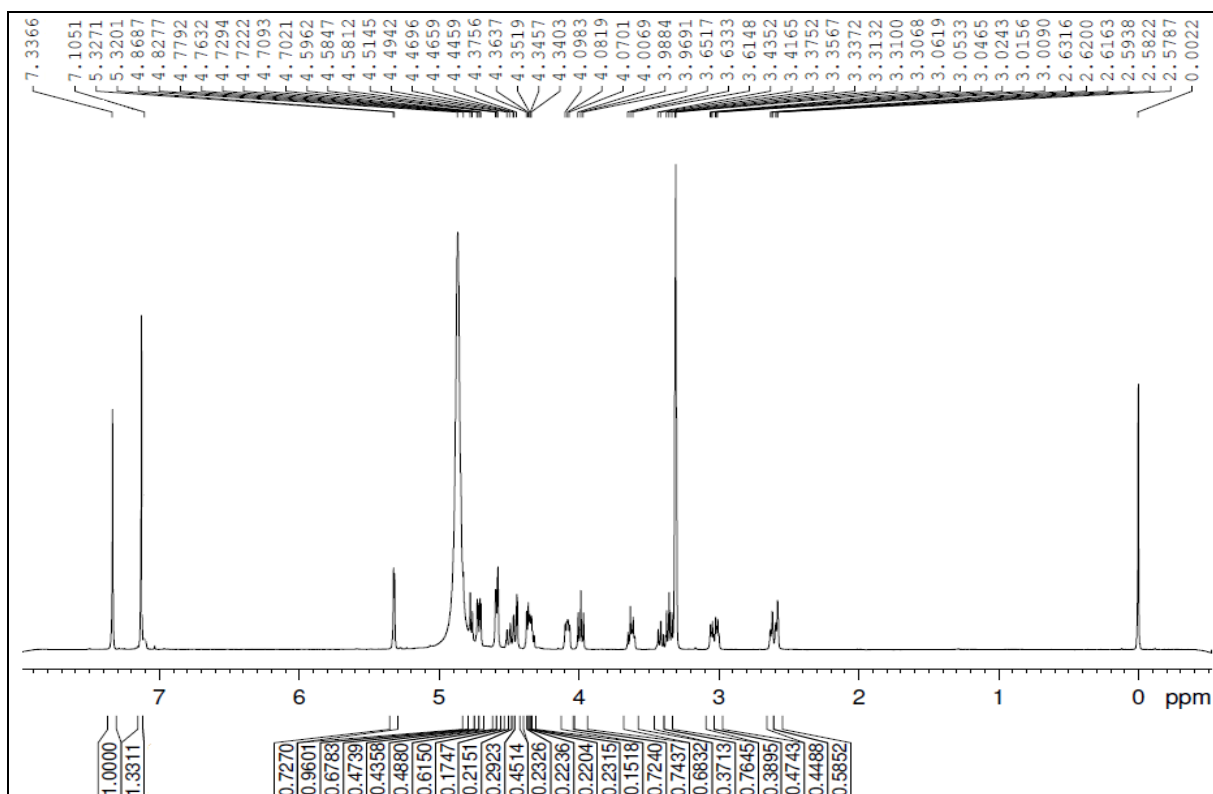

**Figure S5.** <sup>1</sup>H NMR spectrum of **1** (400 MHz, CD<sub>3</sub>OD)

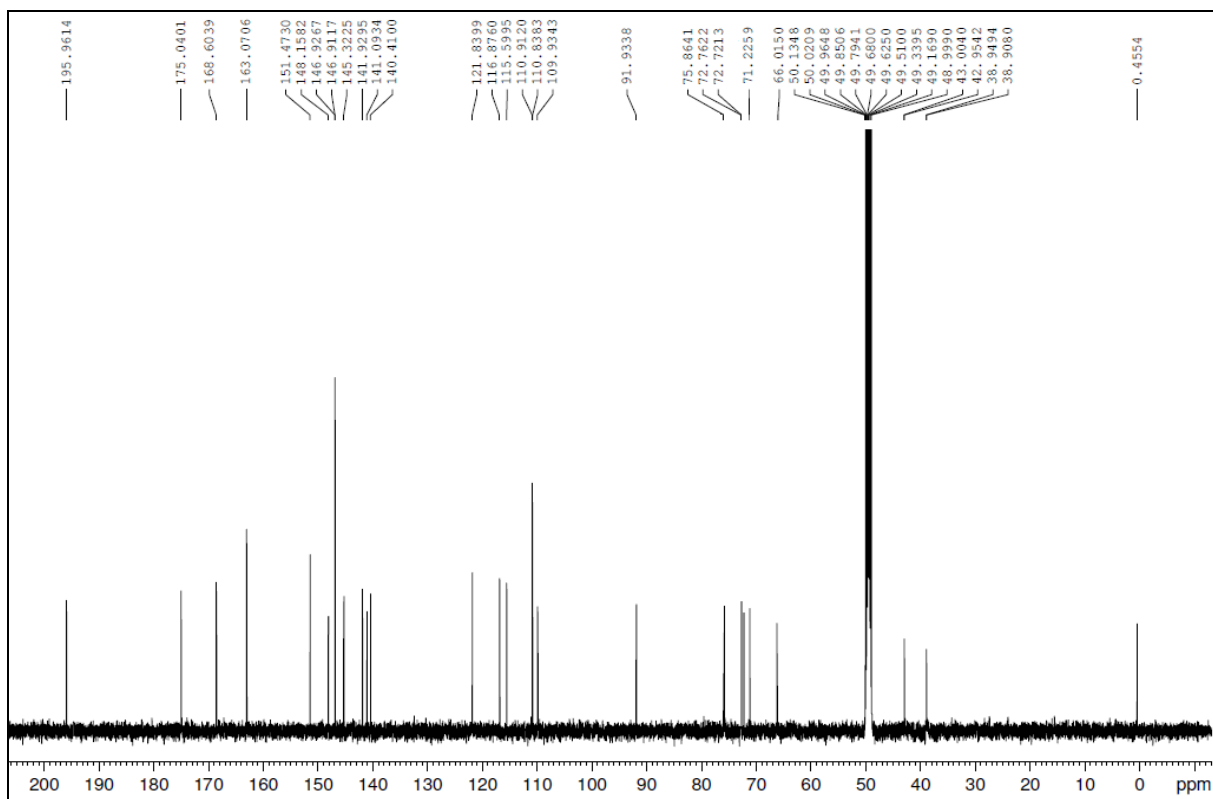

**Figure S6.** <sup>13</sup>C NMR spectrum of **1** (100 MHz, CD<sub>3</sub>OD)

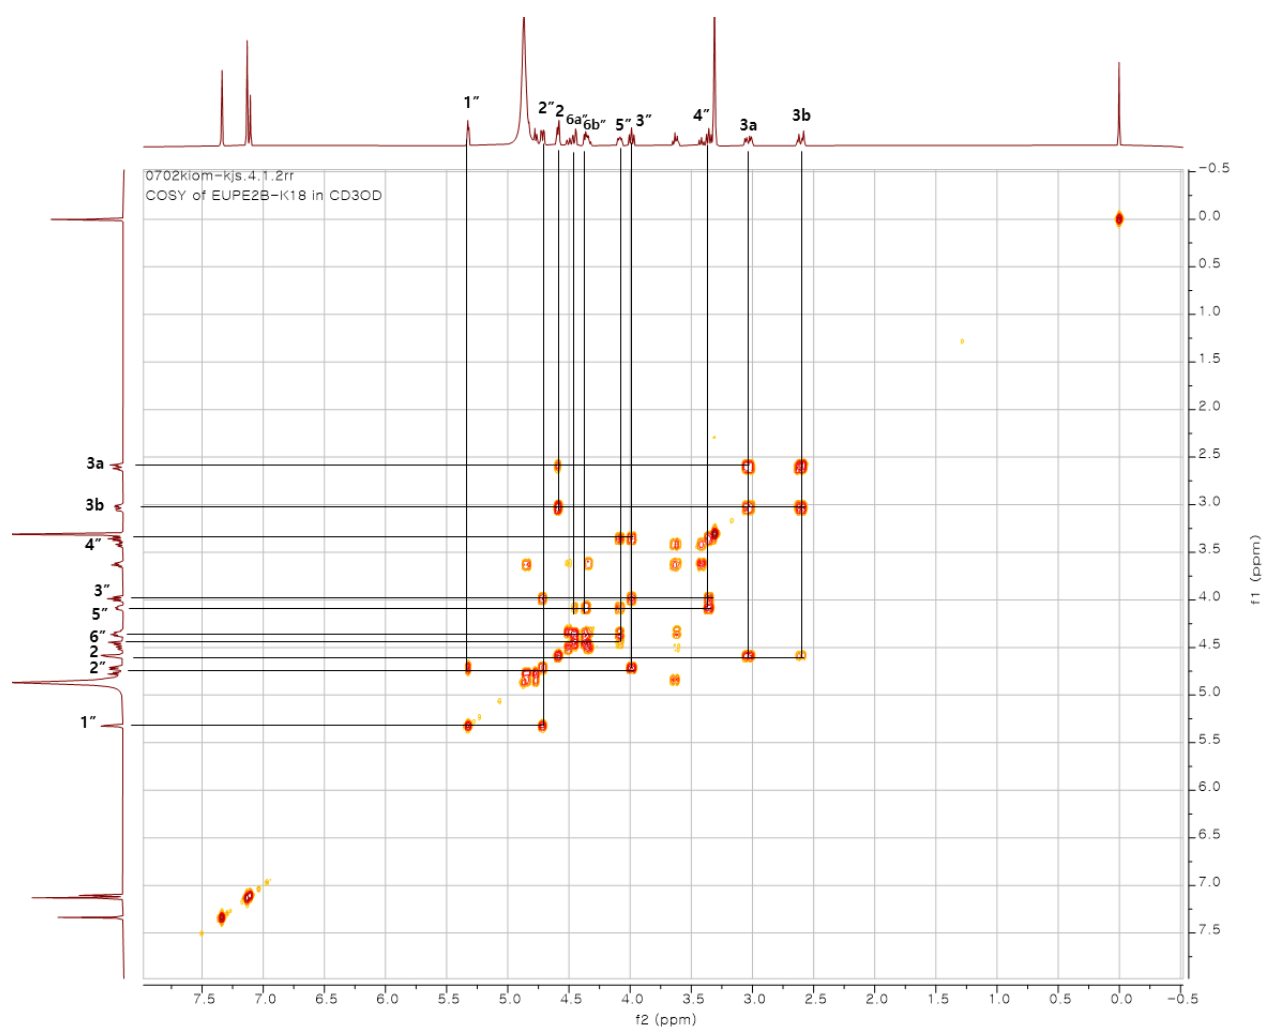

**Figure S7.**  $^1\text{H}$ - $^1\text{H}$  COSY spectrum of **1** (500 MHz,  $\text{CD}_3\text{OD}$ )



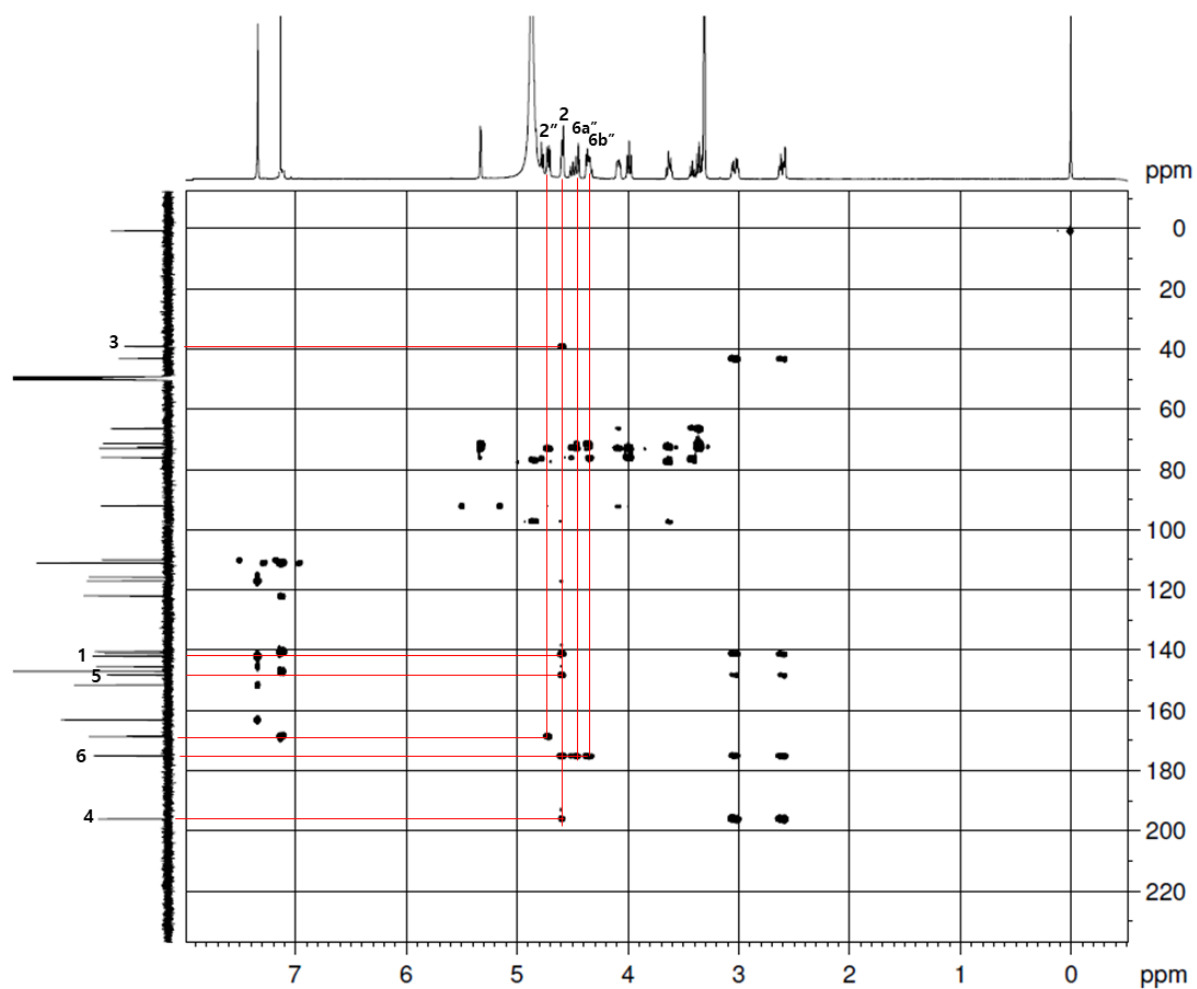

**Figure S8.** HMBC spectrum of **1** (500 MHz, CD<sub>3</sub>OD)

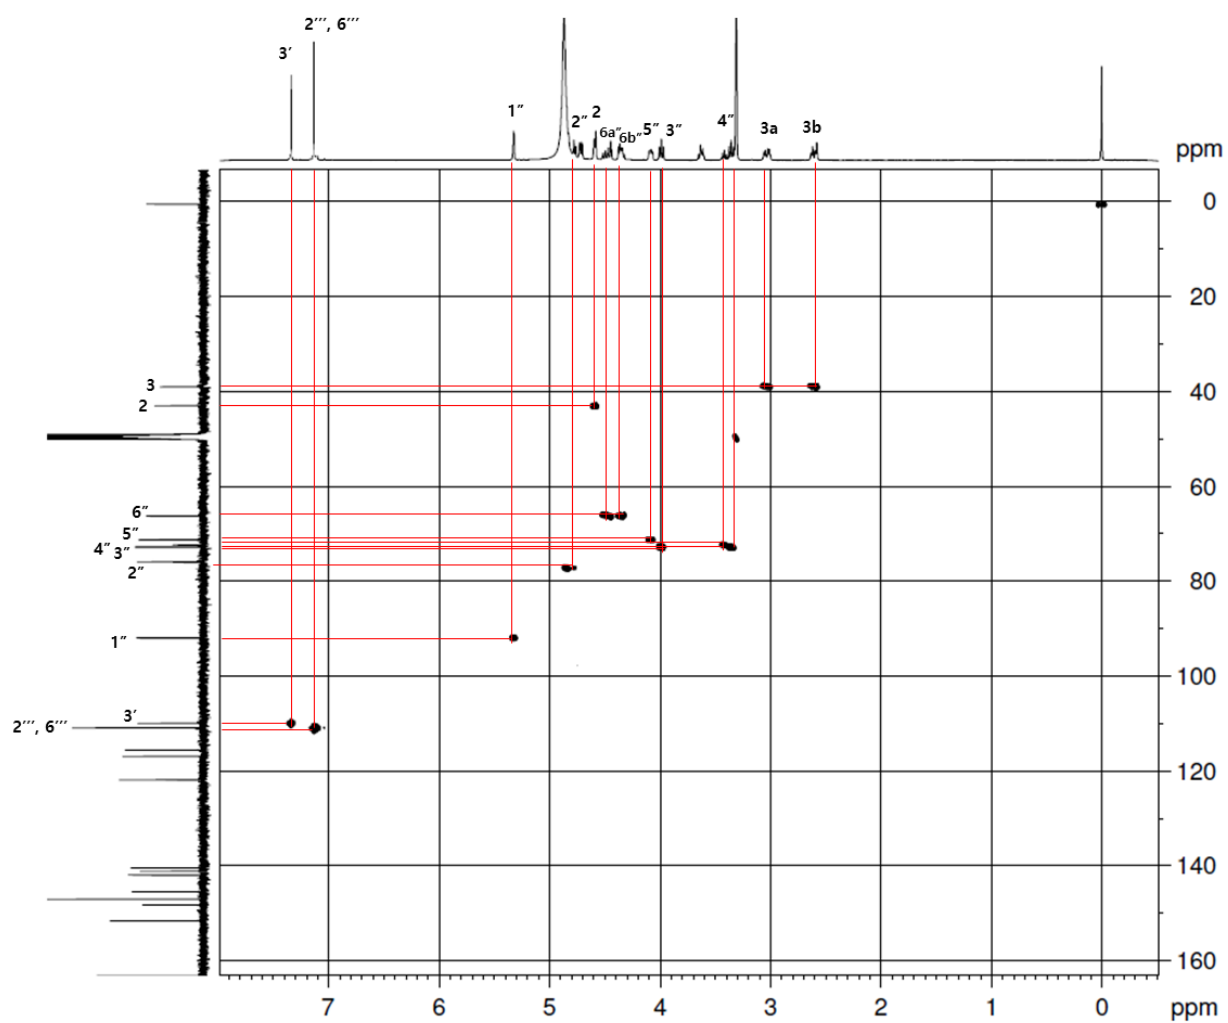

**Figure S9.** HMQC spectrum of **1** (500 MHz, CD<sub>3</sub>OD)

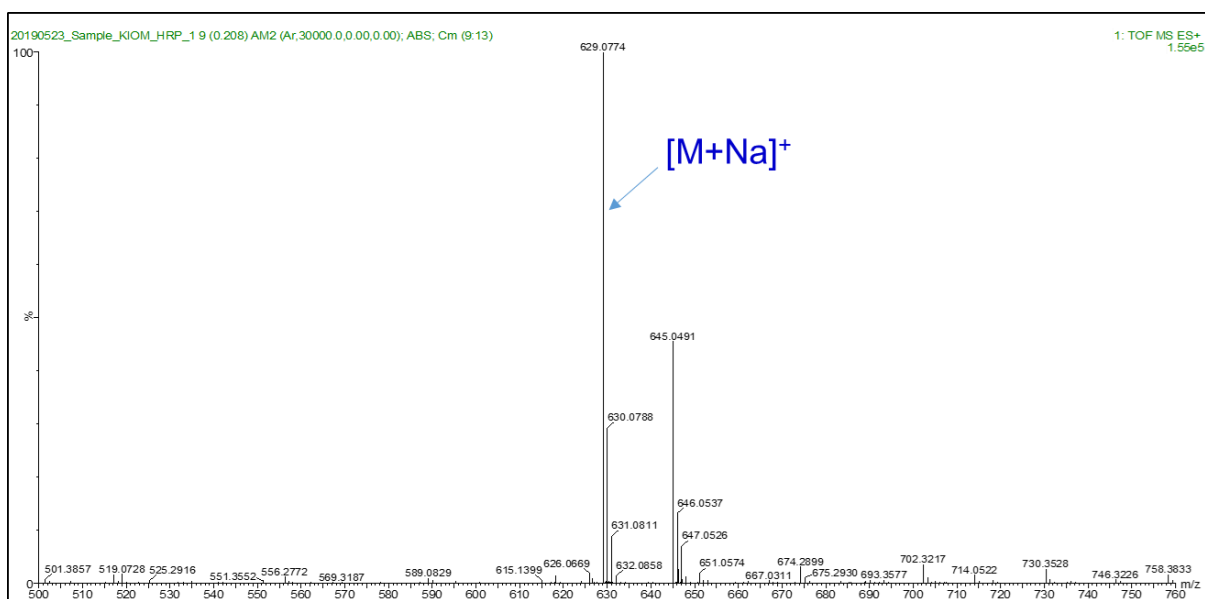

**Figure S10.** HRESIMS spectrum of **1**
